# Supplementary material
Source: publisher site journal article supplement (https://www.dovepress.com/article/478362)
Supplement: Supplementary file 1 [file get_supplementary_file.php]

**Table S1** Primers used in this study

| Primer | Sequence (5'→3') |
| --- | --- |
| *bla*OXA-58-F | AGTATTGGGGCTTGTGCTGA |
| *bla*OXA-58-R | TCGGTCTAAATGCGTGCCAT |
| *rpoB*-F | TCCGCACGTAAAGTAGGAAC |
| *rpoB*-R | ATGCCGCCTGAAAAAGTAAC |

**Table S2** Sequencing information of isolates in this study

| Isolate ID | Patient ID | Genome size (bp) | GC content | Number of scaffolds | N50 length | coverage | Bioproject | GenBank accession number |
| --- | --- | --- | --- | --- | --- | --- | --- | --- |
| AOR01 | P13 | 4046850 | 39.1% | 60 | 135228 | 123 | PRJNA789055 | JAKTIM000000000 |
| AOR02 | P1 | 3983229 | 39.0% | 112 | 60342 | 136 | PRJNA789055 | JAKSXF000000000 |
| AOR03 | P15 | 3808285 | 39.1% | 165 | 45536 | 123 | PRJNA789055 | JAKSXE000000000 |
| AOR04 | P14 | 3537828 | 40.1% | 75 | 80237 | 128 | PRJNA789055 | JAKSXD000000000 |
| AOR05 | P18 | 3882114 | 39.0% | 114 | 55504 | 117 | PRJNA789055 | JAKSXC000000000 |
| AOR06 | P16 | 3826613 | 39.0% | 96 | 72444 | 229 | PRJNA789055 | JAKSXB000000000 |
| AOR07 | P12 | 3827570 | 39.0% | 4 | 3827609 | 1847.89 | PRJNA789055 | CP102934-CP102937 |
| AOR07-BL | P12 | 3828778 | 39.0% | 4 | 3828800 | 1146.9 | PRJNA868510 | CP102762-CP102765 |
| AOR08 | P2 | 3862569 | 39.1% | 97 | 71988 | 116 | PRJNA789055 | JAKSXA000000000 |
| AOR09 | P2 | 3864375 | 39.1% | 97 | 88122 | 109 | PRJNA789055 | JAKSWZ000000000 |
| AOR10 | P19 | 3847413 | 38.9% | 112 | 52768 | 122 | PRJNA789055 | JAKSWY000000000 |
| AOR11 | P21 | 3874539 | 39.1% | 93 | 74569 | 115 | PRJNA789055 | JAKTIK000000000 |
| AOR12 | P17 | 3964308 | 39.0% | 42 | 156772 | 121 | PRJNA789055 | JAKTIJ000000000 |
| AOR13 | P10 | 3814779 | 39.2% | 97 | 79483 | 133 | PRJNA789055 | JAKSWX000000000 |
| AOR14 | P11 | 3986386 | 38.7% | 26 | 283848 | 122 | PRJNA789055 | JAKTII000000000 |
| AOR15 | P11 | 3990057 | 38.7% | 27 | 283844 | 248 | PRJNA789055 | JAKTIH000000000 |
| AOR16 | P24 | 3871842 | 39.1% | 124 | 49054 | 156 | PRJNA789055 | JAKSW000000000 |
| AOR17 | P24 | 3871756 | 39.1% | 125 | 49302 | 137 | PRJNA789055 | JAKSWV000000000 |
| AOR18 | P3 | 4240617 | 38.9% | 86 | 127708 | 137 | PRJNA789055 | JAKTIG000000000 |
| AOR19 | P22 | 3987508 | 39.0% | 153 | 49395 | 123 | PRJNA789055 | JAKSWU000000000 |
| AOR20 | P22 | 3855083 | 39.1% | 174 | 41498 | 124 | PRJNA789055 | JAKSWT000000000 |
| AOR21 | P20 | 3890272 | 39.0% | 109 | 57575 | 111 | PRJNA789055 | JAKSWS000000000 |
| AOR22 | P25 | 3754248 | 39.0% | 100 | 66932 | 114 | PRJNA789055 | JAKSWR000000000 |
| AOR23 | P8 | 3834554 | 39.2% | 116 | 67057 | 115 | PRJNA789055 | JAKSWQ000000000 |
| AOR24 | P27 | 3827455 | 39.0% | 112 | 67776 | 126 | PRJNA789055 | JAKSWP000000000 |
| AOR25 | P27 | 3832795 | 39.0% | 111 | 66896 | 123 | PRJNA789055 | JAKSWO000000000 |
| AOR26 | P26 | 3848408 | 39.1% | 67 | 94771 | 138 | PRJNA789055 | JAKSWN000000000 |
| AOR27 | P9 | 3406450 | 38.6% | 105 | 58414 | 121 | PRJNA789055 | JAKSWM000000000 |
| AOR28 | P9 | 3404037 | 38.6% | 105 | 58414 | 150 | PRJNA789055 | JAKSWL000000000 |
| AOR30 | P30 | 3946253 | 39.0% | 109 | 64853 | 126 | PRJNA789055 | JAKSWJ000000000 |
| AOR31 | P32 | 4062749 | 39.0% | 55 | 154699 | 131 | PRJNA789055 | JAKTIF000000000 |
| AOR32 | P32 | 3906382 | 38.9% | 67 | 99825 | 119 | PRJNA789055 | JAKSWI0000000000 |
| AOR33 | P28 | 5369890 | 38.9% | 316 | 30122 | 124 | PRJNA789055 | JAKTIE000000000 |
| AOR34 | P4 | 3337758 | 38.7% | 86 | 68915 | 125 | PRJNA789055 | JAKTID000000000 |
| AOR35 | P33 | 3955958 | 39.0% | 104 | 60209 | 133 | PRJNA789055 | JAKSWH000000000 |
| AOR36 | P34 | 3951466 | 39.1% | 36 | 275308 | 115 | PRJNA789055 | JAKSWG000000000 |
| AOR37 | P33 | 3955399 | 39.0% | 103 | 63155 | 132 | PRJNA789055 | JAKSWF000000000 |
| AOR38 | P29 | 4045406 | 39.0% | 66 | 132608 | 129 | PRJNA789055 | JAKTIC000000000 |
| AOR39 | P5 | 3992717 | 38.9% | 88 | 82491 | 133 | PRJNA789055 | JAKTIB000000000 |
| AOR40 | P5 | 3993391 | 38.9% | 90 | 82491 | 150 | PRJNA789055 | JAKTIA000000000 |
| AOR41 | P7 | 4007710 | 38.8% | 50 | 152561 | 138 | PRJNA789055 | JAKTHZ000000000 |
| AOR42 | P31 | 4021326 | 39.0% | 64 | 129695 | 124 | PRJNA789055 | JAKTHY000000000 |
| AOR43 | P6 | 4214881 | 38.9% | 40 | 368183 | 127 | PRJNA789055 | JAKTHX000000000 |
| AOR44 | P6 | 4071347 | 39.0% | 68 | 143727 | 127 | PRJNA789055 | JAKTHW000000000 |
| AOR45 | P35 | 3761238 | 39.0% | 104 | 68393 | 124 | PRJNA789055 | JAKSWE000000000 |
| AOR46 | P23 | 3812549 | 39.0% | 87 | 82236 | 112 | PRJNA789055 | JAKSWD000000000 |
| AOR48 | P36 | 4501570 | 37.9% | 72 | 115971 | 140 | PRJNA789055 | JAKSWC000000000 |
| AOR49 | P37 | 4041533 | 39.1% | 125 | 56302 | 125 | PRJNA789055 | JAKSWB000000000 |
| AOR50 | P37 | 4034642 | 39.1% | 125 | 56302 | 127 | PRJNA789055 | JAKSWA000000000 |
